# Supplementary material
Source: Springer Nature journal article supplement (https://www.springermedizin.de/resource/supplementary/12879_2009_1069_MOESM2_ESM.pdf/9442514)
Supplement: MOESM2 [file 9442514]

|         |          | Amsterdam |       |       | Rotterdam |       |       | South-Limburg |       |      |
|---------|----------|-----------|-------|-------|-----------|-------|-------|---------------|-------|------|
|         | Risk     | Low       | Med   | High  | Low       | Med   | High  | Low           | Med   | High |
| Block A | clusters | 6         | 6     | 1     | 3         | 4     | 3     | 4             | 9     | 3    |
|         | invitees | 8644      | 13082 | 1232  | 1939      | 9722  | 6353  | 2873          | 8229  | 2146 |
| Block B | clusters | 24        | 27    | 7     | 12        | 18    | 12    | 3             | 9     | 3    |
|         | invitees | 39725     | 59485 | 10223 | 19585     | 40174 | 26005 | 3456          | 8084  | 2410 |
| Block C | clusters | 6         | 6     | 1     | 3         | 4     | 3     | 4             | 8     | 2    |
|         | invitees | 8033      | 11196 | 1574  | 2197      | 7597  | 7755  | 2738          | 8784  | 2445 |
| Total   | clusters | 36        | 39    | 9     | 18        | 26    | 18    | 11            | 26    | 8    |
|         | invitees | 56402     | 83763 | 13029 | 23703     | 57493 | 40113 | 9067          | 25097 | 7001 |
